# Supplementary material for: Impact of Tralopyril and Triazolyl Glycosylated Chalcone in Human Retinal Cells’ Lipidome
Source: MDPI journal article supplement (doi:10.3390/molecules27165247), 2022-08-17
Supplement: s1 [file s1]

# **Impact of tralopyril and triazolyl glycosylated chalcone in human retinal cells lipidome**

**Cátia Vilas-Boas <sup>1,2</sup>, Logan Running <sup>3</sup>, Daniela Pereira <sup>1,2</sup>, Honorina Cidade <sup>1,2</sup>, Marta Correia-da-Silva <sup>1,2</sup>, Gunes Ekin Atilla-Gokcumen <sup>3,\*</sup> and Diana S. Aga <sup>3,\*</sup>**

<sup>1</sup> Laboratory of Organic and Pharmaceutical Chemistry, Department of Chemical Sciences, Faculty of Pharmacy, University of Porto, 4050-313 Porto, Portugal

<sup>2</sup> CIIMAR/CIMAR—Interdisciplinary Center for Marine and Environmental Research, University of Porto, 4450-208 Matosinhos, Portugal

<sup>3</sup> Chemistry Department, University at Buffalo, The State University of New York, Buffalo, NY 14260, USA

\* Correspondence: ekinatil@buffalo.edu (G.E.A.-G.); dianaaga@buffalo.edu (D.S.A.)

## Table of contents

|                                            |    |
|--------------------------------------------|----|
| 1. Synthesis and purity of compound 1..... | 3  |
| 2. Target lipidomic.....                   | 4  |
| 3. References.....                         | 11 |

### 1. Purity of compound 1

A promising nature-inspired AF compound, a triazolyl glycosylated chalcone (compound 1) was obtained by click chemistry according to our previously described synthesis [1]. Its purity was evaluated by a high-performance liquid chromatography method coupled to an ultraviolet detector (HPLC-UV) (Figure S1).

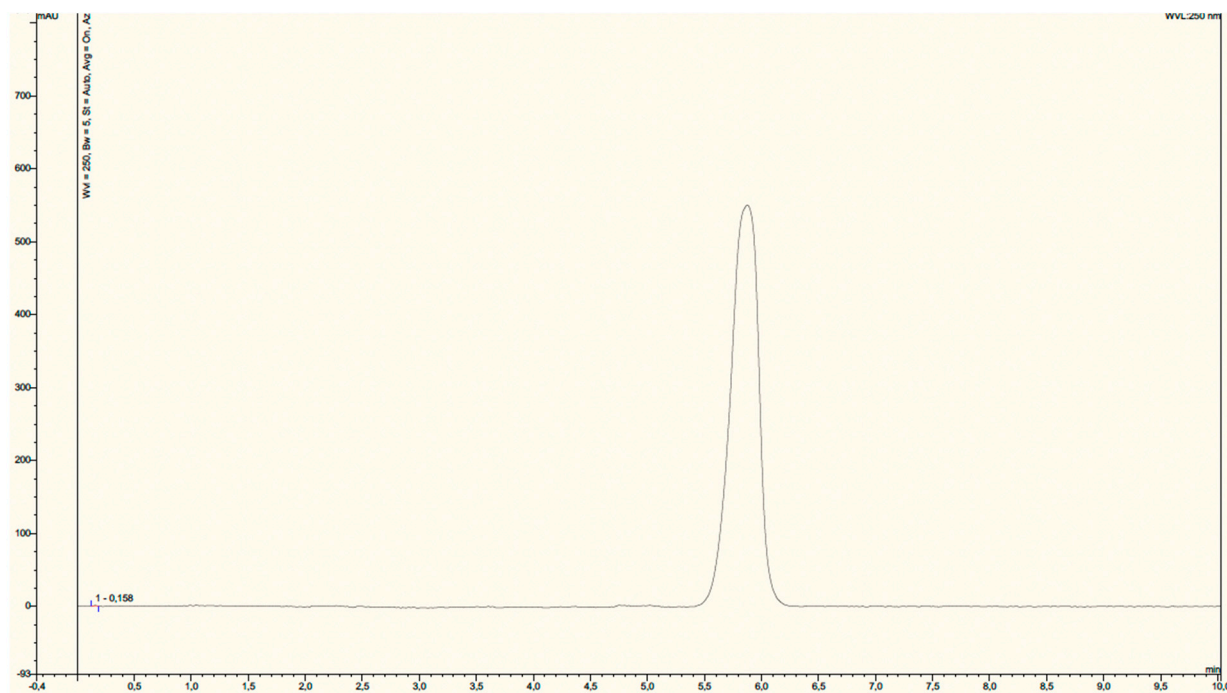

**Figure S1.** Representative chromatograms of pure compound 1 (200  $\mu$ M) dissolved in MeOH with a chromatographic signal at 5.9 min at 250 nm when a mobile phase containing water/acetonitrile (30:70 (v/v)) acidified with acetic acid (pH 2.5) was used.

## 2. Lipidomics results

**Table S1.** Lipid standards used, mass-to-charge ratios ( $m/z$ 's), retention time (RT) of internal standards. The total carbon number on the acyl chains and the degree of unsaturation of the fatty acyl chains in the lipid species are listed, i.e. 16:0 corresponds to 16 carbons and 0 double bonds.

| Species               | Adduct               | $m/z$    | PPM error | RT (Min) | Abundance | Compound 1  |         | Econe <sup>®</sup> |         |
|-----------------------|----------------------|----------|-----------|----------|-----------|-------------|---------|--------------------|---------|
|                       |                      |          |           |          |           | Fold Change | P-value | Fold Change        | P-Value |
| D9 Oleic acid         | [M - H] <sup>-</sup> | 290.3051 | -5.17     | 36.897   | 6.57E+05  | 1.07        | 0.2071  | 1.05               | 0.6305  |
| C17:0 CER             | [M - H] <sup>-</sup> | 550.5205 | -6.36     | 64.339   | 9.89E+07  | 1.05        | 0.2440  | 1.02               | 0.8000  |
| C39:0 TAG             | [M + H] <sup>+</sup> | 698.6293 | 2.58      | 64.126   | 7.72E+07  | 1.08        | 0.1983  | 1.03               | 0.7998  |
| C57:0 TAG             | [M + H] <sup>+</sup> | 950.9110 | -5.99     | 69.461   | 3.39E+07  | 0.89        | 0.0691  | 1.00               | 0.9307  |
| D70 DSPC              | [M + H] <sup>+</sup> | 861.0724 | 3.60      | 59.771   | 7.02E+07  | 1.00        | 0.9667  | 0.92               | 0.2989  |
| C17:0 Sphingosine     | [M + H] <sup>+</sup> | 286.2700 | 8.73      | 38.794   | 1.77E+08  | 1.14        | 0.1689  | 0.88               | 0.4806  |
| C17:0 SM              | [M + H] <sup>+</sup> | 717.5905 | 3.07      | 56.696   | 7.20E+07  | 1.00        | 0.8917  | 1.18               | 0.0740  |
| C17:0 Glucosoceramide | [M + H] <sup>+</sup> | 696.5773 | 1.29      | 57.128   | 2.22E+08  | 1.07        | 0.2071  | 1.05               | 0.6305  |

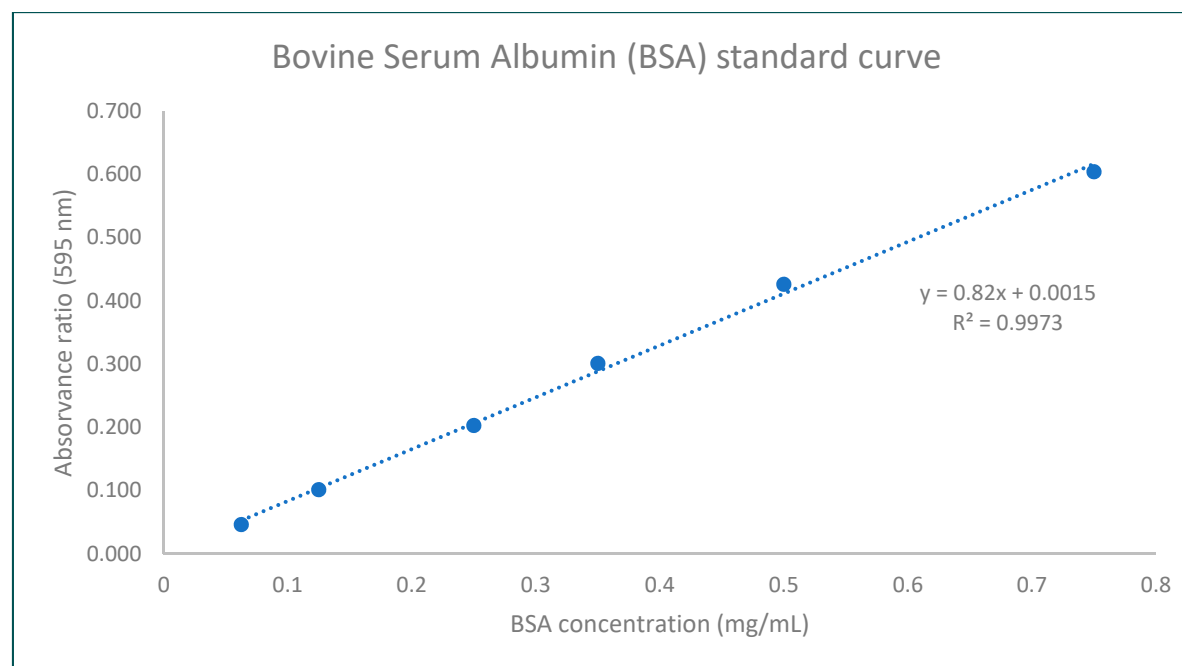

**Figure S2.** Linearity of the Bradford calibration graph.

**Table S2.** Protein normalization using Bradford protein assay. Cell extracts were reconstituted so that each sample was normalized to a concentration relative to the replicate with the lowest protein content. Due to cell toxicity, there was lower protein content in the Econeal<sup>®</sup> treated samples. To account for this, aliquots of each control group was diluted to normalize protein content in the controls to the Econeal<sup>®</sup> treated samples. Protein normalization for Compound 1 and Econeal<sup>®</sup> with their respective controls are seen here.

| Samples                                  | Amount of protein per sample (µg)<br>(in pellet collected, prior to<br>normalization) | Protein concentration in<br>µg/µL<br>(10 µL injected for analysis) | Protein content of each<br>sample analysed in µg(<br>after normalization) |
|------------------------------------------|---------------------------------------------------------------------------------------|--------------------------------------------------------------------|---------------------------------------------------------------------------|
| Control                                  | 228.3                                                                                 | 1.46                                                               | 14.6                                                                      |
|                                          | 188.1                                                                                 |                                                                    |                                                                           |
|                                          | 175.5                                                                                 |                                                                    |                                                                           |
| Compound 1                               | 276.4                                                                                 |                                                                    |                                                                           |
|                                          | 237.8                                                                                 |                                                                    |                                                                           |
|                                          | 209.4                                                                                 |                                                                    |                                                                           |
| Diluted Control for Econeal <sup>®</sup> | 93.8                                                                                  | 0.6                                                                | 6                                                                         |
|                                          | 77.3                                                                                  |                                                                    |                                                                           |
|                                          | 72.1                                                                                  |                                                                    |                                                                           |
| Econeal <sup>®</sup>                     | 101.3                                                                                 |                                                                    |                                                                           |
|                                          | 85.6                                                                                  |                                                                    |                                                                           |
|                                          | 73                                                                                    |                                                                    |                                                                           |

**Table S3.** Raw abundances for controls and treated samples (N=3).

| Species | Approx<br>RT (Min) | <i>m/z</i> | Control<br>1 | Control<br>2 | Control<br>3 | Compound<br>1 | Compound<br>2 | Compound<br>3 | Diluted<br>Control<br>1 | Diluted<br>Control<br>2 | Diluted<br>Control<br>3 | Econeal 1 | Econeal 2 | Econeal 3 |
|---------|--------------------|------------|--------------|--------------|--------------|---------------|---------------|---------------|-------------------------|-------------------------|-------------------------|-----------|-----------|-----------|
|---------|--------------------|------------|--------------|--------------|--------------|---------------|---------------|---------------|-------------------------|-------------------------|-------------------------|-----------|-----------|-----------|

|          |      |          |          |          |          |          |          |          |          |          |          |          |          |          |
|----------|------|----------|----------|----------|----------|----------|----------|----------|----------|----------|----------|----------|----------|----------|
| PC C28:3 | 38.7 | 672.4604 | 3.47E+08 | 3.91E+08 | 2.68E+08 | 2.31E+08 | 3.71E+08 | 3.80E+08 | 2.11E+08 | 2.29E+08 | 1.54E+08 | 3.11E+08 | 3.53E+08 | 3.16E+08 |
| PC C30:1 | 55.2 | 704.5230 | 1.07E+08 | 1.25E+08 | 1.47E+08 | 8.30E+07 | 9.58E+07 | 7.91E+07 | 4.56E+07 | 4.39E+07 | 5.51E+07 | 1.02E+08 | 1.08E+08 | 1.49E+08 |
| PC C30:0 | 56.0 | 706.5387 | 3.48E+08 | 4.00E+08 | 4.53E+08 | 3.41E+08 | 3.81E+08 | 3.41E+08 | 1.66E+08 | 1.64E+08 | 1.93E+08 | 2.19E+08 | 2.30E+08 | 2.84E+08 |
| PC C32:3 | 55.9 | 728.5230 | 5.59E+07 | 7.00E+07 | 8.37E+07 | 5.63E+07 | 6.32E+07 | 5.34E+07 | 2.10E+07 | 1.97E+07 | 2.68E+07 | 5.58E+07 | 5.86E+07 | 7.87E+07 |
| PC C32:2 | 55.9 | 730.5387 | 1.89E+08 | 2.21E+08 | 2.59E+08 | 1.62E+08 | 1.90E+08 | 1.63E+08 | 8.60E+07 | 8.07E+07 | 1.01E+08 | 1.75E+08 | 1.90E+08 | 2.43E+08 |
| PC C32:1 | 56.7 | 732.5543 | 7.54E+08 | 8.20E+08 | 8.81E+08 | 7.57E+08 | 8.39E+08 | 7.38E+08 | 4.37E+08 | 4.12E+08 | 4.79E+08 | 6.55E+08 | 6.72E+08 | 7.96E+08 |
| PC 32:0  | 57.4 | 734.5700 | 3.92E+08 | 4.06E+08 | 4.34E+08 | 3.44E+08 | 3.38E+08 | 3.34E+08 | 2.58E+08 | 2.57E+08 | 2.84E+08 | 1.85E+08 | 1.89E+08 | 2.05E+08 |
| PC C34:4 | 56.7 | 754.5387 | 3.23E+07 | 4.35E+07 | 4.53E+07 | 4.36E+07 | 4.10E+07 | 3.91E+07 | 1.95E+07 | 1.91E+07 | 2.34E+07 | 2.33E+07 | 2.49E+07 | 3.13E+07 |
| PC C34:3 | 56.3 | 756.5543 | 1.57E+08 | 1.69E+08 | 1.90E+08 | 1.35E+08 | 1.47E+08 | 1.30E+08 | 8.71E+07 | 8.55E+07 | 9.92E+07 | 1.49E+08 | 1.51E+08 | 1.89E+08 |
| PC C34:2 | 57.1 | 758.5700 | 6.93E+08 | 7.26E+08 | 7.77E+08 | 6.51E+08 | 6.87E+08 | 6.21E+08 | 4.45E+08 | 4.19E+08 | 4.80E+08 | 6.26E+08 | 6.27E+08 | 7.25E+08 |
| PC C34:1 | 57.4 | 760.5856 | 1.09E+09 | 1.11E+09 | 1.12E+09 | 1.13E+09 | 1.03E+09 | 1.10E+09 | 8.95E+08 | 8.62E+08 | 9.06E+08 | 8.95E+08 | 9.02E+08 | 9.72E+08 |
| PC C34:0 | 58.8 | 762.6013 | 8.74E+07 | 8.99E+07 | 9.85E+07 | 1.01E+08 | 1.05E+08 | 9.40E+07 | 5.45E+07 | 5.34E+07 | 6.02E+07 | 3.33E+07 | 3.27E+07 | 3.60E+07 |
| PC C36:4 | 57.4 | 782.5700 | 3.16E+08 | 3.76E+08 | 3.70E+08 | 3.18E+08 | 3.40E+08 | 3.16E+08 | 2.93E+08 | 2.58E+08 | 2.77E+08 | 3.31E+08 | 3.40E+08 | 3.66E+08 |
| PC C36:3 | 57.6 | 784.5856 | 3.33E+08 | 3.46E+08 | 3.56E+08 | 3.25E+08 | 3.43E+08 | 3.12E+08 | 2.32E+08 | 2.12E+08 | 2.33E+08 | 3.08E+08 | 3.08E+08 | 3.48E+08 |
| PC C36:2 | 58.4 | 786.6013 | 7.86E+08 | 8.08E+08 | 8.29E+08 | 7.82E+08 | 7.99E+08 | 7.50E+08 | 5.83E+08 | 5.37E+08 | 5.91E+08 | 6.60E+08 | 6.51E+08 | 7.22E+08 |
| PC C36:1 | 59.3 | 788.6169 | 4.77E+08 | 5.06E+08 | 5.30E+08 | 4.64E+08 | 4.86E+08 | 4.40E+08 | 2.97E+08 | 2.63E+08 | 3.31E+08 | 2.95E+08 | 2.97E+08 | 3.43E+08 |
| PC C38:5 | 57.7 | 808.5856 | 3.63E+08 | 3.89E+08 | 3.87E+08 | 2.92E+08 | 3.11E+08 | 2.92E+08 | 2.71E+08 | 2.55E+08 | 2.93E+08 | 3.26E+08 | 3.28E+08 | 3.65E+08 |
| PC C38:4 | 58.8 | 810.6013 | 3.93E+08 | 4.09E+08 | 4.26E+08 | 3.07E+08 | 3.36E+08 | 3.14E+08 | 2.72E+08 | 2.57E+08 | 2.69E+08 | 2.96E+08 | 3.07E+08 | 3.47E+08 |
| PC C38:3 | 59.0 | 812.6169 | 2.08E+08 | 2.13E+08 | 2.31E+08 | 1.61E+08 | 1.73E+08 | 1.60E+08 | 1.29E+08 | 1.23E+08 | 1.44E+08 | 1.18E+08 | 1.22E+08 | 1.41E+08 |
| PC C38:2 | 59.5 | 814.6326 | 4.04E+07 | 4.19E+07 | 4.72E+07 | 4.06E+07 | 4.23E+07 | 3.91E+07 | 2.26E+07 | 2.10E+07 | 2.59E+07 | 2.05E+07 | 2.06E+07 | 2.59E+07 |
| PC C40:6 | 58.7 | 834.6013 | 8.20E+07 | 8.96E+07 | 9.67E+07 | 6.66E+07 | 6.97E+07 | 6.39E+07 | 5.31E+07 | 5.09E+07 | 6.09E+07 | 3.33E+07 | 3.35E+07 | 3.77E+07 |
| PC C40:5 | 58.9 | 836.6169 | 1.59E+08 | 1.69E+08 | 1.81E+08 | 1.11E+08 | 1.14E+08 | 1.10E+08 | 1.04E+08 | 9.43E+07 | 1.15E+08 | 9.46E+07 | 9.55E+07 | 1.08E+08 |

|          |      |          |          |          |          |          |          |          |          |          |          |          |          |          |
|----------|------|----------|----------|----------|----------|----------|----------|----------|----------|----------|----------|----------|----------|----------|
| PC C40:4 | 59.5 | 838.6326 | 6.08E+07 | 6.33E+07 | 7.40E+07 | 5.05E+07 | 5.10E+07 | 5.10E+07 | 3.26E+07 | 2.86E+07 | 4.12E+07 | 3.94E+07 | 3.75E+07 | 4.59E+07 |
| PC C40:2 | 60.7 | 842.6639 | 3.53E+06 | 3.68E+06 | 4.49E+06 | 3.86E+06 | 4.00E+06 | 4.04E+06 | 1.57E+06 | 1.69E+06 | 2.12E+06 | 2.14E+06 | 1.89E+06 | 2.56E+06 |
| PC C40:1 | 61.5 | 844.6795 | 2.39E+06 | 2.71E+06 | 3.16E+06 | 2.94E+06 | 3.04E+06 | 3.10E+06 | 1.35E+06 | 1.30E+06 | 1.37E+06 | 7.78E+05 | 6.48E+05 | 8.04E+05 |
| PC C40:0 | 62.4 | 846.6952 | 4.91E+05 | 4.80E+05 | 6.21E+05 | 8.96E+05 | 8.97E+05 | 9.35E+05 | 3.68E+05 | 3.70E+04 | 3.43E+05 | 2.27E+05 | 3.13E+05 | 2.43E+05 |
| PC C42:6 | 59.0 | 862.6326 | 1.30E+07 | 1.53E+07 | 1.48E+07 | 8.23E+06 | 7.82E+06 | 8.43E+06 | 8.43E+06 | 7.61E+06 | 8.89E+06 | 5.87E+06 | 5.67E+06 | 8.00E+06 |
| PC C42:5 | 59.7 | 864.6482 | 2.69E+07 | 2.87E+07 | 3.12E+07 | 1.71E+07 | 1.91E+07 | 1.79E+07 | 1.47E+07 | 1.37E+07 | 1.60E+07 | 1.22E+07 | 1.19E+07 | 1.53E+07 |
| PC C42:4 | 60.4 | 866.6639 | 1.12E+07 | 1.09E+07 | 1.24E+07 | 6.09E+06 | 6.85E+06 | 6.63E+06 | 4.84E+06 | 4.62E+06 | 5.28E+06 | 3.74E+06 | 3.74E+06 | 4.83E+06 |
| PC C42:3 | 61.1 | 868.6795 | 3.19E+06 | 3.54E+06 | 4.05E+06 | 2.67E+06 | 2.71E+06 | 2.58E+06 | 2.31E+06 | 1.71E+06 | 1.94E+06 | 9.39E+05 | 8.08E+05 | 9.40E+05 |
| PC C42:2 | 61.8 | 870.6952 | 3.93E+06 | 4.69E+06 | 5.16E+06 | 4.55E+06 | 4.85E+06 | 4.66E+06 | 2.32E+06 | 2.22E+06 | 2.37E+06 | 1.14E+06 | 1.09E+06 | 1.44E+06 |
| PC C42:1 | 62.8 | 872.7108 | 3.92E+06 | 4.45E+06 | 4.86E+06 | 5.29E+06 | 5.85E+06 | 6.03E+06 | 2.01E+06 | 1.99E+06 | 2.30E+06 | 9.12E+05 | 8.94E+05 | 1.22E+06 |
| PC C42:0 | 63.4 | 874.7265 | 1.49E+06 | 1.66E+06 | 1.82E+06 | 2.65E+06 | 3.08E+06 | 2.98E+06 | 8.69E+05 | 8.40E+05 | 9.19E+05 | 4.89E+05 | 4.64E+05 | 4.74E+05 |
| PC C44:6 | 60.1 | 890.6639 | 8.59E+06 | 9.45E+06 | 1.06E+07 | 4.45E+06 | 5.14E+06 | 5.07E+06 | 3.86E+06 | 3.95E+06 | 4.12E+06 | 2.35E+06 | 2.36E+06 | 2.75E+06 |
| PC C44:5 | 60.7 | 892.6795 | 4.16E+06 | 4.80E+06 | 5.13E+06 | 2.18E+06 | 2.18E+06 | 2.10E+06 | 2.33E+06 | 2.18E+06 | 2.30E+06 | 1.28E+06 | 1.09E+06 | 1.21E+06 |
| PC C44:4 | 61.4 | 894.6952 | 3.95E+06 | 4.90E+06 | 5.45E+06 | 2.18E+06 | 2.92E+06 | 2.64E+06 | 2.25E+06 | 2.08E+06 | 2.46E+06 | 1.10E+06 | 1.04E+06 | 1.44E+06 |
| PC C44:3 | 62.1 | 896.7108 | 2.10E+06 | 2.62E+06 | 2.21E+06 | 1.83E+06 | 2.44E+06 | 1.95E+06 | 1.52E+06 | 1.20E+06 | 1.61E+06 | 4.37E+05 | 4.72E+05 | 6.35E+05 |
| PC C44:2 | 62.8 | 898.7265 | 5.30E+06 | 6.25E+06 | 6.80E+06 | 6.19E+06 | 6.92E+06 | 6.87E+06 | 3.27E+06 | 2.70E+06 | 2.66E+06 | 9.62E+05 | 9.69E+05 | 1.10E+06 |
| PC C44:1 | 63.7 | 900.7421 | 3.74E+06 | 4.20E+06 | 4.70E+06 | 6.86E+06 | 7.27E+06 | 6.68E+06 | 1.94E+06 | 1.83E+06 | 2.12E+06 | 9.49E+05 | 9.68E+05 | 1.09E+06 |
| PC C44:0 | 64.2 | 902.7578 | 3.73E+05 | 3.65E+05 | 4.12E+05 | 6.89E+05 | 8.37E+05 | 6.38E+05 | 2.33E+05 | 2.00E+05 | 2.98E+05 | 2.23E+05 | 1.98E+05 | 2.57E+05 |
| PC C46:6 | 61.1 | 918.6952 | 3.02E+06 | 3.26E+06 | 4.05E+06 | 1.99E+06 | 2.41E+06 | 2.10E+06 | 1.69E+06 | 1.45E+06 | 1.87E+06 | 8.54E+05 | 8.71E+05 | 9.41E+05 |
| PC C46:5 | 62.5 | 920.7108 | 2.66E+06 | 2.69E+06 | 3.40E+06 | 2.03E+06 | 2.51E+06 | 2.57E+06 | 1.40E+06 | 1.31E+06 | 1.64E+06 | 6.74E+05 | 7.64E+05 | 7.98E+05 |
| PC C46:4 | 63.4 | 922.7265 | 1.87E+06 | 2.06E+06 | 2.55E+06 | 2.04E+06 | 2.16E+06 | 2.23E+06 | 1.05E+06 | 1.06E+06 | 1.12E+06 | 6.01E+05 | 5.00E+05 | 6.53E+05 |
| PC C46:3 | 63.4 | 924.7421 | 1.26E+06 | 1.71E+06 | 1.97E+06 | 1.70E+06 | 1.91E+06 | 1.75E+06 | 8.01E+05 | 7.19E+05 | 8.29E+05 | 3.89E+05 | 3.60E+05 | 3.40E+05 |
| PC C46:2 | 63.8 | 926.7578 | 1.33E+06 | 1.35E+06 | 1.49E+06 | 2.00E+06 | 1.94E+06 | 1.83E+06 | 6.51E+05 | 5.16E+05 | 6.33E+05 | 2.89E+05 | 2.30E+05 | 2.88E+05 |

|           |      |          |          |          |          |          |          |          |          |          |          |          |          |          |
|-----------|------|----------|----------|----------|----------|----------|----------|----------|----------|----------|----------|----------|----------|----------|
| PC C48:6  | 63.3 | 946.7265 | 3.82E+05 | 4.37E+05 | 3.85E+05 | 6.05E+05 | 6.59E+05 | 6.93E+05 | 1.78E+05 | 2.25E+05 | 1.73E+05 | ND       | ND       | ND       |
| PC C48:5  | 63.5 | 948.7421 | 8.37E+05 | 8.39E+05 | 9.80E+05 | 8.52E+05 | 7.61E+05 | 7.22E+05 | 4.28E+05 | 3.96E+05 | 4.79E+05 | 2.74E+05 | 3.37E+05 | 2.44E+05 |
| DAG C34:2 | 64.5 | 575.5039 | 1.17E+06 | 1.44E+06 | 5.20E+05 | 1.42E+06 | 1.39E+06 | 1.02E+06 | 7.64E+05 | 7.35E+05 | 8.06E+05 | 7.37E+05 | 8.15E+05 | 3.51E+05 |
| DAG C34:1 | 64.9 | 577.5196 | 3.32E+06 | 4.25E+06 | 9.02E+05 | 3.16E+06 | 4.81E+06 | 4.43E+06 | 1.29E+06 | 1.92E+06 | 2.51E+06 | 1.93E+06 | 2.06E+06 | 4.79E+05 |
| DAG C36:4 | 64.6 | 599.5039 | 1.02E+06 | 1.18E+06 | 3.87E+05 | 7.32E+05 | 1.11E+06 | 1.18E+06 | 4.05E+05 | 5.43E+05 | 6.71E+05 | 5.49E+05 | 6.12E+05 | 2.04E+05 |
| DAG C36:2 | 64.5 | 603.5352 | 1.14E+07 | 1.27E+07 | 5.11E+06 | 7.66E+06 | 1.20E+07 | 1.22E+07 | 5.21E+06 | 6.52E+06 | 7.40E+06 | 6.14E+06 | 6.50E+06 | 2.39E+06 |
| DAG C36:1 | 64.9 | 605.5509 | 1.42E+07 | 1.68E+07 | 4.36E+06 | 1.10E+07 | 1.64E+07 | 1.65E+07 | 5.36E+06 | 7.24E+06 | 9.28E+06 | 8.04E+06 | 8.29E+06 | 2.47E+06 |
| DAG C38:5 | 64.8 | 625.5196 | 2.80E+06 | 4.26E+06 | 8.38E+05 | 2.29E+06 | 3.58E+06 | 3.68E+06 | 1.14E+06 | 1.50E+06 | 2.04E+06 | 1.57E+06 | 1.98E+06 | 3.12E+05 |
| DAG C38:4 | 65.2 | 627.5352 | 1.37E+07 | 1.70E+07 | 5.24E+06 | 9.99E+06 | 1.57E+07 | 1.45E+07 | 6.11E+06 | 7.22E+06 | 9.17E+06 | 7.39E+06 | 8.47E+06 | 2.30E+06 |
| DAG C36:4 | 60.8 | 617.5145 | 7.44E+06 | 7.16E+06 | 7.22E+06 | 8.60E+06 | 6.65E+06 | 5.18E+06 | 6.05E+06 | 6.41E+06 | 6.77E+06 | 4.73E+06 | 3.68E+06 | 4.37E+06 |
| DAG C36:0 | 61.3 | 643.5302 | 5.71E+06 | 5.84E+06 | 5.44E+06 | 5.02E+06 | 4.27E+06 | 3.51E+06 | 3.54E+06 | 3.54E+06 | 4.00E+06 | 3.44E+06 | 2.69E+06 | 2.71E+06 |
| TAG C30:4 | 56.2 | 564.4259 | 7.45E+05 | 7.10E+05 | 7.03E+05 | 9.50E+05 | 9.89E+05 | 9.22E+05 | 5.32E+05 | 5.49E+05 | 5.53E+05 | 1.01E+06 | 1.23E+06 | 7.38E+05 |
| TAG C38:4 | 54.4 | 676.5511 | 8.54E+06 | 1.08E+07 | 1.39E+07 | 6.56E+06 | 8.72E+06 | 7.37E+06 | 2.32E+06 | 3.11E+06 | 4.03E+06 | 2.55E+06 | 3.10E+06 | 4.01E+06 |
| TAG C48:4 | 61.5 | 816.7076 | 2.72E+07 | 3.30E+07 | 3.92E+07 | 1.88E+07 | 2.29E+07 | 2.40E+07 | 9.39E+06 | 1.18E+07 | 1.43E+07 | 7.06E+06 | 8.19E+06 | 9.43E+06 |
| TAG C50:4 | 66.9 | 848.7702 | 2.61E+07 | 3.03E+07 | 1.83E+07 | 3.39E+07 | 3.42E+07 | 2.89E+07 | 1.65E+07 | 1.83E+07 | 1.61E+07 | 1.61E+06 | 1.69E+07 | 1.84E+07 |
| TAG C50:2 | 66.9 | 848.7707 | 1.74E+07 | 1.98E+07 | 2.12E+07 | 2.48E+07 | 2.41E+07 | 2.13E+07 | 1.12E+07 | 1.07E+07 | 1.17E+07 | 1.01E+07 | 9.59E+06 | 1.08E+07 |
| TAG C50:1 | 67.2 | 850.7864 | 1.74E+07 | 2.04E+07 | 2.31E+07 | 2.54E+07 | 2.89E+07 | 2.80E+07 | 1.32E+07 | 1.20E+07 | 1.32E+07 | 9.27E+06 | 8.71E+06 | 8.87E+06 |
| TAG C54:5 | 66.8 | 898.7864 | 2.30E+07 | 2.01E+07 | 2.24E+07 | 1.81E+07 | 1.80E+07 | 1.38E+07 | 1.67E+07 | 1.69E+07 | 1.69E+07 | 2.66E+07 | 2.43E+07 | 2.58E+07 |
| TAG C54:4 | 67.1 | 900.8020 | 1.03E+07 | 8.16E+06 | 7.86E+06 | 1.24E+07 | 1.09E+07 | 7.90E+06 | 4.46E+06 | 3.36E+06 | 3.67E+06 | 5.76E+06 | 5.27E+06 | 6.07E+06 |
| TAG C54:1 | 67.7 | 906.8490 | 7.01E+05 | 5.96E+05 | 6.48E+05 | 2.03E+06 | 1.90E+06 | 1.81E+06 | 3.40E+05 | 3.40E+05 | 3.86E+05 | 3.30E+05 | 3.16E+05 | 4.25E+05 |
| TAG C54:0 | 68.7 | 908.8646 | 1.35E+06 | 1.29E+06 | 1.33E+06 | 1.65E+06 | 1.87E+06 | 1.34E+06 | 1.49E+06 | 1.50E+06 | 1.35E+06 | 1.52E+06 | 1.41E+06 | 1.29E+06 |
| TAG C56:8 | 66.5 | 920.7707 | 2.42E+06 | 2.83E+06 | 2.77E+06 | 1.11E+06 | 1.04E+06 | 8.15E+05 | 1.17E+06 | 8.98E+05 | 9.72E+05 | 3.01E+06 | 2.73E+06 | 3.38E+06 |
| TAG C56:6 | 67.0 | 924.8020 | 9.97E+06 | 1.15E+07 | 1.23E+07 | 7.48E+06 | 8.63E+06 | 7.38E+06 | 8.28E+06 | 9.08E+06 | 9.37E+06 | 1.79E+07 | 1.55E+07 | 1.82E+07 |

|              |      |          |          |          |          |          |          |          |          |          |          |          |          |          |
|--------------|------|----------|----------|----------|----------|----------|----------|----------|----------|----------|----------|----------|----------|----------|
| TAG C58:8    | 67.0 | 948.8020 | 5.55E+06 | 6.57E+06 | 3.35E+06 | 3.53E+06 | 3.57E+06 | 2.56E+06 | 3.35E+06 | 2.67E+06 | 3.38E+06 | 8.88E+06 | 8.61E+06 | 1.12E+07 |
| TAG C58:2    | 69.0 | 960.8959 | 9.18E+05 | 8.40E+05 | 9.79E+05 | 1.86E+06 | 1.44E+06 | 1.33E+06 | 3.34E+05 | 2.98E+05 | 3.45E+05 | 3.55E+05 | 2.53E+05 | 3.29E+05 |
| TAG C60:6    | 67.8 | 980.8646 | 4.98E+06 | 4.79E+06 | 4.59E+06 | 6.82E+06 | 6.12E+06 | 5.47E+06 | 5.81E+06 | 4.57E+06 | 4.82E+06 | 5.46E+06 | 4.59E+06 | 4.89E+06 |
| TAG C60:4    | 68.6 | 984.8959 | 4.06E+05 | 3.54E+05 | 4.71E+05 | 5.23E+05 | 5.45E+05 | 4.67E+05 | 2.90E+05 | 3.51E+05 | 4.21E+05 | 1.28E+05 | 1.25E+05 | 1.25E+05 |
| Cer C14:0    | 61.7 | 508.4730 | 8.76E+05 | 9.52E+05 | 8.98E+05 | 5.05E+05 | 4.90E+05 | 4.11E+05 | 2.99E+05 | 2.72E+05 | 2.36E+05 | 4.76E+05 | 6.82E+05 | 7.58E+05 |
| Cer C16:1    | 62.2 | 534.4886 | 9.51E+05 | 8.82E+05 | 9.27E+05 | 6.19E+05 | 5.35E+05 | 4.07E+05 | 3.76E+05 | 3.24E+05 | 2.52E+05 | 2.75E+05 | 3.64E+05 | 3.62E+05 |
| Cer C18:1    | 64.1 | 562.5199 | 3.16E+05 | 3.05E+05 | 3.06E+05 | 1.29E+05 | 1.40E+05 | 1.06E+05 | 1.19E+05 | 1.22E+05 | 9.84E+04 | 4.11E+04 | 3.17E+04 | 3.43E+04 |
| Cer C18:0    | 65.1 | 564.5356 | 3.09E+06 | 3.32E+06 | 3.30E+06 | 1.38E+06 | 1.50E+06 | 1.34E+06 | 1.15E+06 | 1.29E+06 | 1.13E+06 | 6.51E+05 | 8.27E+05 | 8.34E+05 |
| Cer C20:0    | 66.6 | 592.5669 | 1.30E+06 | 1.36E+06 | 1.40E+06 | 6.09E+05 | 6.86E+05 | 5.76E+05 | 6.15E+05 | 5.48E+05 | 5.34E+05 | 2.95E+05 | 3.26E+05 | 3.79E+05 |
| Cer C22:1    | 66.6 | 618.5825 | 1.91E+06 | 1.95E+06 | 2.12E+06 | 8.58E+05 | 8.85E+05 | 8.40E+05 | 1.03E+06 | 9.04E+05 | 8.73E+05 | 2.51E+05 | 2.99E+05 | 3.51E+05 |
| Cer C22:0    | 67.8 | 620.5982 | 6.75E+06 | 7.10E+06 | 7.38E+06 | 4.26E+06 | 4.48E+06 | 4.02E+06 | 3.09E+06 | 2.86E+06 | 2.63E+06 | 1.19E+06 | 1.50E+06 | 1.67E+06 |
| Cer C24:1    | 67.8 | 646.6138 | 1.64E+07 | 1.68E+07 | 1.76E+07 | 1.02E+07 | 1.08E+07 | 9.28E+06 | 7.65E+06 | 7.33E+06 | 6.48E+06 | 3.26E+06 | 4.08E+06 | 4.53E+06 |
| Cer C24:0    | 69.2 | 648.6295 | 1.87E+07 | 2.00E+07 | 1.98E+07 | 1.99E+07 | 2.16E+07 | 1.92E+07 | 7.91E+06 | 7.49E+06 | 6.83E+06 | 2.10E+06 | 2.68E+06 | 3.05E+06 |
| Cer C26:1    | 69.2 | 674.6451 | 2.76E+06 | 2.75E+06 | 3.05E+06 | 2.07E+06 | 2.10E+06 | 1.93E+06 | 9.70E+05 | 1.05E+06 | 9.34E+05 | 4.93E+05 | 6.25E+05 | 6.50E+05 |
| Cer C26:0    | 71.0 | 676.6608 | 1.76E+06 | 2.08E+06 | 2.12E+06 | 2.71E+06 | 2.79E+06 | 2.42E+06 | 7.27E+05 | 7.50E+05 | 6.61E+05 | 2.71E+05 | 2.92E+05 | 3.22E+05 |
| DiHCer C16:0 | 64.1 | 538.5199 | 1.03E+06 | 1.05E+06 | 1.02E+06 | 4.75E+05 | 4.93E+05 | 4.60E+05 | 4.12E+05 | 4.08E+05 | 3.95E+05 | 2.86E+06 | 3.68E+06 | 4.25E+06 |
| DiHCer C18:0 | 65.6 | 566.5512 | 4.90E+05 | 6.09E+05 | 5.88E+05 | 2.85E+05 | 2.68E+05 | 2.69E+05 | 2.63E+05 | 3.08E+05 | 2.05E+05 | 7.45E+05 | 8.58E+05 | 9.54E+05 |
| DiHCer C20:0 | 67.0 | 594.5825 | 5.29E+05 | 4.85E+05 | 4.83E+05 | 2.57E+05 | 3.18E+05 | 2.13E+05 | 2.58E+05 | 2.64E+05 | 2.20E+05 | 4.20E+05 | 4.38E+05 | 4.35E+05 |
| DiHCer C22:0 | 68.3 | 622.6138 | 1.56E+06 | 1.73E+06 | 1.64E+06 | 8.93E+05 | 1.06E+06 | 9.18E+05 | 8.20E+05 | 7.34E+05 | 7.34E+05 | 1.25E+06 | 1.21E+06 | 1.32E+06 |
| DiHCer C24:0 | 69.2 | 650.6451 | 3.34E+06 | 3.47E+06 | 3.65E+06 | 3.06E+06 | 3.61E+06 | 3.01E+06 | 1.60E+06 | 1.43E+06 | 1.48E+06 | 1.11E+06 | 1.22E+06 | 1.34E+06 |
| SM C14:0     | 54.4 | 675.5436 | 2.25E+07 | 2.88E+07 | 3.64E+07 | 1.85E+07 | 2.38E+07 | 2.05E+07 | 6.68E+06 | 8.21E+06 | 1.17E+07 | 1.01E+07 | 1.18E+07 | 1.40E+07 |
| SM C16:1     | 55.0 | 701.5592 | 5.41E+07 | 6.64E+07 | 8.35E+07 | 4.58E+07 | 5.75E+07 | 4.92E+07 | 1.53E+07 | 1.89E+07 | 2.54E+07 | 1.75E+07 | 1.98E+07 | 2.69E+07 |
| SM C16:0     | 55.9 | 703.5749 | 2.93E+08 | 3.52E+08 | 4.24E+08 | 2.47E+08 | 3.35E+08 | 2.74E+08 | 8.71E+07 | 1.14E+08 | 1.45E+08 | 1.13E+08 | 1.36E+08 | 1.67E+08 |

|            |      |          |          |          |          |          |          |          |          |          |          |          |          |          |
|------------|------|----------|----------|----------|----------|----------|----------|----------|----------|----------|----------|----------|----------|----------|
| SM C24:0   | 61.5 | 815.7001 | 4.84E+07 | 5.84E+07 | 6.99E+07 | 3.37E+07 | 4.06E+07 | 4.28E+07 | 1.69E+07 | 2.13E+07 | 2.59E+07 | 1.31E+07 | 1.49E+07 | 1.69E+07 |
| SM C18:1   | 56.6 | 729.5905 | 3.73E+06 | 4.37E+06 | 5.15E+06 | 2.49E+06 | 2.89E+06 | 2.32E+06 | 1.29E+06 | 1.54E+06 | 2.14E+06 | 1.46E+06 | 1.59E+06 | 1.75E+06 |
| SM C18:0   | 57.5 | 731.6062 | 1.13E+07 | 1.39E+07 | 1.50E+07 | 7.61E+06 | 9.55E+06 | 8.26E+06 | 4.46E+06 | 5.98E+06 | 7.45E+06 | 4.62E+06 | 5.60E+06 | 5.47E+06 |
| SM C22:0   | 60.3 | 787.6688 | 2.55E+07 | 3.10E+07 | 3.78E+07 | 1.43E+07 | 1.87E+07 | 1.54E+07 | 7.06E+06 | 9.85E+06 | 1.22E+07 | 5.70E+06 | 7.73E+06 | 8.47E+06 |
| SM C24:1   | 60.3 | 813.6844 | 7.85E+07 | 8.95E+07 | 1.06E+08 | 4.35E+07 | 5.46E+07 | 5.15E+07 | 2.64E+07 | 3.17E+07 | 3.88E+07 | 1.90E+07 | 2.32E+07 | 2.71E+07 |
| SM C26:1   | 61.5 | 841.7157 | 5.96E+06 | 7.42E+06 | 8.84E+06 | 2.79E+06 | 3.28E+06 | 3.89E+06 | 2.27E+06 | 2.68E+06 | 3.26E+06 | 1.62E+06 | 1.72E+06 | 2.10E+06 |
| SM C26:0   | 62.6 | 843.7314 | 2.18E+06 | 2.49E+06 | 2.90E+06 | 1.35E+06 | 1.61E+06 | 1.72E+06 | 8.51E+05 | 9.54E+05 | 1.32E+06 | 7.43E+05 | 7.40E+05 | 8.38E+05 |
| Dhsm C14:0 | 55.0 | 677.5592 | 4.61E+06 | 5.56E+06 | 6.88E+06 | 2.39E+06 | 3.04E+06 | 2.68E+06 | 1.25E+06 | 1.75E+06 | 2.07E+06 | 3.88E+06 | 4.57E+06 | 5.59E+06 |
| dHSM C16:0 | 56.5 | 705.5905 | 2.02E+07 | 2.42E+07 | 2.63E+07 | 9.59E+06 | 1.20E+07 | 1.01E+07 | 7.47E+06 | 9.52E+06 | 1.08E+07 | 1.31E+07 | 1.53E+07 | 1.79E+07 |
| dHSM C22:1 | 59.5 | 785.6531 | 8.74E+06 | 1.06E+07 | 1.27E+07 | 4.09E+06 | 5.45E+06 | 4.56E+06 | 4.63E+06 | 5.05E+06 | 5.62E+06 | 2.46E+06 | 3.46E+06 | 4.79E+06 |

**Table S4.** Lipid species, and mass-to-charge ratios ( $m/z$ 's) in each sample. Fold change was determined as [Abundance compound] / [Abundance Control] for each lipid species. The total carbon number on the acyl chains and the degree of unsaturation of the fatty acyl chains in the lipid species are listed, i.e. 16:0 corresponds to 16 carbons and 0 double bonds.

|          |                      |          |               |                | Compound 1 |          | Econe® |          |
|----------|----------------------|----------|---------------|----------------|------------|----------|--------|----------|
| Species  | Adduct               | $m/z$    | Observed mass | PPM error (<5) | FC         | P-Value  | FC     | P-Value  |
| PC C28:3 | [M + H] <sup>+</sup> | 672.4604 | 672.4618      | -2.1           | 1.0        | 9.03E-01 | 1.7    | 7.91E-03 |
| PC C30:1 | [M + H] <sup>+</sup> | 704.5230 | 704.5234      | -0.5           | 0.7        | 3.43E-02 | 2.5    | 9.51E-03 |
| PC C30:0 | [M + H] <sup>+</sup> | 706.5387 | 706.5382      | 0.7            | 0.9        | 2.36E-01 | 1.4    | 3.42E-02 |
| PC C32:3 | [M + H] <sup>+</sup> | 728.5230 | 728.5228      | 0.3            | 0.8        | 2.25E-01 | 2.9    | 5.12E-03 |
| PC C32:2 | [M + H] <sup>+</sup> | 730.5387 | 730.5386      | 0.1            | 0.8        | 7.99E-02 | 2.3    | 6.06E-03 |

|          |                      |          |          |      |     |          |     |          |
|----------|----------------------|----------|----------|------|-----|----------|-----|----------|
| PC C32:1 | [M + H] <sup>+</sup> | 732.5543 | 732.5571 | -3.8 | 1.0 | 4.45E-01 | 1.6 | 5.49E-03 |
| PC 32:0  | [M + H] <sup>+</sup> | 734.5700 | 734.5712 | -1.7 | 0.8 | 4.81E-03 | 0.7 | 2.62E-03 |
| PC C34:4 | [M + H] <sup>+</sup> | 754.5387 | 754.5373 | 1.8  | 1.0 | 8.45E-01 | 1.3 | 1.06E-01 |
| PC C34:3 | [M + H] <sup>+</sup> | 756.5543 | 756.5558 | -1.9 | 0.8 | 3.35E-02 | 1.8 | 6.09E-03 |
| PC C34:2 | [M + H] <sup>+</sup> | 758.5700 | 758.5723 | -3.1 | 0.9 | 6.35E-02 | 1.5 | 4.80E-03 |
| PC C34:1 | [M + H] <sup>+</sup> | 760.5856 | 760.5882 | -3.4 | 1.0 | 6.35E-01 | 1.0 | 2.74E-01 |
| PC C34:0 | [M + H] <sup>+</sup> | 762.6013 | 762.5974 | 5.1  | 1.1 | 1.61E-01 | 0.6 | 7.03E-04 |
| PC C36:4 | [M + H] <sup>+</sup> | 782.5700 | 782.5729 | -3.7 | 0.9 | 2.29E-01 | 1.3 | 8.76E-03 |
| PC C36:3 | [M + H] <sup>+</sup> | 784.5856 | 784.5883 | -3.4 | 0.9 | 1.75E-01 | 1.4 | 3.12E-03 |
| PC C36:2 | [M + H] <sup>+</sup> | 786.6013 | 786.6013 | 0.0  | 1.0 | 1.85E-01 | 1.2 | 1.83E-02 |
| PC C36:1 | [M + H] <sup>+</sup> | 788.6169 | 788.6195 | -3.3 | 0.9 | 1.15E-01 | 1.0 | 5.95E-01 |
| PC C38:5 | [M + H] <sup>+</sup> | 808.5856 | 808.5856 | 0.0  | 0.8 | 1.63E-03 | 1.2 | 1.69E-02 |
| PC C38:4 | [M + H] <sup>+</sup> | 810.6013 | 810.6031 | -2.2 | 0.8 | 2.15E-03 | 1.2 | 3.62E-02 |
| PC C38:3 | [M + H] <sup>+</sup> | 812.6169 | 812.6165 | 0.5  | 0.8 | 2.82E-03 | 1.0 | 6.17E-01 |
| PC C38:2 | [M + H] <sup>+</sup> | 814.6326 | 814.6331 | -0.6 | 0.9 | 3.25E-01 | 1.0 | 7.33E-01 |
| PC C40:6 | [M + H] <sup>+</sup> | 834.6013 | 834.6004 | 1.1  | 0.7 | 7.72E-03 | 0.6 | 3.83E-03 |
| PC C40:5 | [M + H] <sup>+</sup> | 836.6169 | 836.6169 | 0.0  | 0.7 | 8.04E-04 | 1.0 | 5.44E-01 |
| PC C40:4 | [M + H] <sup>+</sup> | 838.6326 | 838.6309 | 2.0  | 0.8 | 2.03E-02 | 1.2 | 2.05E-01 |
| PC C40:2 | [M + H] <sup>+</sup> | 842.6639 | 842.6642 | -0.4 | 1.0 | 8.39E-01 | 1.2 | 1.89E-01 |
| PC C40:1 | [M + H] <sup>+</sup> | 844.6795 | 844.6815 | -2.3 | 1.1 | 2.99E-01 | 0.6 | 3.44E-04 |
| PC C40:0 | [M + H] <sup>+</sup> | 846.6952 | 846.6952 | 0.0  | 1.7 | 1.29E-03 | 1.0 | 9.20E-01 |
| PC C42:6 | [M + H] <sup>+</sup> | 862.6326 | 862.6294 | 3.7  | 0.6 | 1.05E-03 | 0.8 | 9.76E-02 |

|           |                       |          |          |      |     |          |     |          |
|-----------|-----------------------|----------|----------|------|-----|----------|-----|----------|
| PC C42:5  | [M + H] <sup>+</sup>  | 864.6482 | 864.6478 | 0.5  | 0.6 | 1.48E-03 | 0.9 | 2.58E-01 |
| PC C42:4  | [M + H] <sup>+</sup>  | 866.6639 | 866.6601 | 4.4  | 0.6 | 6.67E-04 | 0.8 | 1.21E-01 |
| PC C42:3  | [M + H] <sup>+</sup>  | 868.6795 | 868.6778 | 2.0  | 0.7 | 2.06E-02 | 0.5 | 3.70E-03 |
| PC C42:2  | [M + H] <sup>+</sup>  | 870.6952 | 870.6958 | -0.7 | 1.0 | 8.10E-01 | 0.5 | 7.84E-04 |
| PC C42:1  | [M + H] <sup>+</sup>  | 872.7108 | 872.7123 | -1.7 | 1.3 | 2.01E-02 | 0.5 | 1.63E-03 |
| PC C42:0  | [M + H] <sup>+</sup>  | 874.7265 | 874.7265 | 0.0  | 1.8 | 1.47E-03 | 0.5 | 7.76E-05 |
| PC C44:6  | [M + H] <sup>+</sup>  | 890.6639 | 890.6623 | 1.8  | 0.5 | 1.71E-03 | 0.6 | 6.28E-04 |
| PC C44:5  | [M + H] <sup>+</sup>  | 892.6795 | 892.6765 | 3.4  | 0.5 | 9.01E-04 | 0.5 | 1.11E-04 |
| PC C44:4  | [M + H] <sup>+</sup>  | 894.6952 | 894.6958 | -0.7 | 0.5 | 1.10E-02 | 0.5 | 3.03E-03 |
| PC C44:3  | [M + H] <sup>+</sup>  | 896.7108 | 896.7118 | -1.1 | 0.9 | 3.91E-01 | 0.4 | 2.49E-03 |
| PC C44:2  | [M + H] <sup>+</sup>  | 898.7265 | 898.7269 | -0.4 | 1.1 | 3.34E-01 | 0.4 | 7.36E-04 |
| PC C44:1  | [M + H] <sup>+</sup>  | 900.7421 | 900.7427 | -0.7 | 1.6 | 1.11E-03 | 0.5 | 5.21E-04 |
| PC C44:0  | [M + H] <sup>+</sup>  | 902.7578 | 902.7566 | 1.3  | 1.9 | 5.36E-03 | 0.9 | 6.27E-01 |
| PC C46:6  | [M + H] <sup>+</sup>  | 918.6952 | 918.6926 | 2.8  | 0.6 | 1.89E-02 | 0.5 | 3.38E-03 |
| PC C46:5  | [M + H] <sup>+</sup>  | 920.7108 | 920.7137 | -3.1 | 0.8 | 1.39E-01 | 0.5 | 2.65E-03 |
| PC C46:4  | [M + H] <sup>+</sup>  | 922.7265 | 922.7243 | 2.4  | 1.0 | 9.48E-01 | 0.5 | 5.71E-04 |
| PC C46:3  | [M + H] <sup>+</sup>  | 924.7421 | 924.7384 | 4.0  | 1.1 | 5.60E-01 | 0.5 | 3.08E-04 |
| PC C46:2  | [M + H] <sup>+</sup>  | 926.7578 | 926.7581 | -0.3 | 1.4 | 1.78E-03 | 0.4 | 2.11E-03 |
| PC C48:6  | [M + H] <sup>+</sup>  | 946.7265 | 946.7269 | -0.4 | 1.6 | 1.29E-03 | -   | -        |
| PC C48:5  | [M + H] <sup>+</sup>  | 948.7421 | 948.7396 | 2.6  | 0.9 | 1.55E-01 | 0.7 | 1.50E-02 |
| DAG C34:2 | [M - OH] <sup>+</sup> | 575.5039 | 575.5089 | -0.3 | 1.0 | 9.03E-01 | 1.6 | 1.24E-02 |
| DAG C34:1 | [M - OH] <sup>+</sup> | 577.5196 | 577.5196 | 0.0  | 1.1 | 6.67E-01 | 1.2 | 1.66E-02 |
| DAG C36:4 | [M - OH] <sup>+</sup> | 599.5039 | 599.5052 | -2.1 | 0.9 | 6.50E-01 | 1.4 | 1.75E-02 |

|           |                        |          |          |      |     |          |     |          |
|-----------|------------------------|----------|----------|------|-----|----------|-----|----------|
| DAG C36:2 | [M - OH] <sup>+</sup>  | 603.5352 | 603.5354 | -0.3 | 1.0 | 9.93E-01 | 1.4 | 4.96E-03 |
| DAG C36:1 | [M - OH] <sup>+</sup>  | 605.5509 | 605.5514 | -0.9 | 0.9 | 6.14E-01 | 1.0 | 6.70E-01 |
| DAG C38:5 | [M - OH] <sup>+</sup>  | 625.5196 | 625.5197 | -0.2 | 0.9 | 6.90E-01 | 1.1 | 6.94E-01 |
| DAG C38:4 | [M - OH] <sup>+</sup>  | 627.5352 | 627.5368 | -2.5 | 0.9 | 5.02E-01 | 1.1 | 3.98E-01 |
| DAG C36:4 | [M + H] <sup>+</sup>   | 617.5145 | 617.5164 | -3.1 | 0.9 | 9.39E-02 | 0.8 | 1.67E-01 |
| DAG C36:0 | [M + H] <sup>+</sup>   | 643.5302 | 643.5315 | -2.0 | 0.8 | 3.61E-02 | 1.2 | 1.55E-01 |
| TAG C30:4 | [M + NH4] <sup>+</sup> | 564.4259 | 564.4293 | -5.4 | 1.3 | 5.64E-04 | 1.8 | 3.48E-02 |
| TAG C38:4 | [M + NH4] <sup>+</sup> | 676.5511 | 676.5475 | 3.5  | 0.7 | 1.02E-01 | 1.0 | 9.19E-01 |
| TAG C48:4 | [M + NH4] <sup>+</sup> | 816.7076 | 816.7051 | 3.1  | 0.7 | 4.18E-02 | 0.7 | 8.48E-02 |
| TAG C50:4 | [M + NH4] <sup>+</sup> | 848.7702 | 848.7759 | -6.7 | 1.3 | 1.29E-01 | 1.0 | 5.79E-01 |
| TAG C50:2 | [M + NH4] <sup>+</sup> | 848.7707 | 848.7728 | -2.5 | 1.2 | 6.26E-02 | 0.9 | 8.80E-02 |
| TAG C50:1 | [M + NH4] <sup>+</sup> | 850.7864 | 850.7906 | -5.0 | 1.4 | 2.17E-02 | 0.7 | 9.09E-04 |
| TAG C54:5 | [M + NH4] <sup>+</sup> | 898.7864 | 898.7863 | 0.1  | 0.8 | 3.59E-02 | 1.5 | 1.98E-04 |
| TAG C54:4 | [M + NH4] <sup>+</sup> | 900.8020 | 900.8049 | -3.2 | 1.2 | 3.39E-01 | 1.5 | 9.57E-03 |
| TAG C54:1 | [M + NH4] <sup>+</sup> | 906.8490 | 906.8473 | 1.8  | 3.0 | 5.50E-05 | 1.0 | 9.59E-01 |
| TAG C54:0 | [M + NH4] <sup>+</sup> | 908.8646 | 908.8656 | -1.1 | 1.2 | 1.31E-01 | 1.0 | 6.64E-01 |
| TAG C56:8 | [M + NH4] <sup>+</sup> | 920.7707 | 920.7705 | 0.2  | 0.4 | 4.38E-04 | 3.0 | 5.86E-04 |
| TAG C56:6 | [M + NH4] <sup>+</sup> | 924.8020 | 924.8067 | -5.1 | 0.7 | 1.21E-02 | 1.9 | 8.09E-04 |
| TAG C58:8 | [M + NH4] <sup>+</sup> | 948.8020 | 948.8063 | -4.5 | 0.5 | 1.57E-02 | 3.0 | 1.61E-03 |
| TAG C58:2 | [M + NH4] <sup>+</sup> | 960.8959 | 960.8985 | -2.7 | 1.7 | 1.83E-02 | 1.0 | 7.16E-01 |
| TAG C60:6 | [M + NH4] <sup>+</sup> | 980.8646 | 980.8694 | -4.9 | 1.3 | 2.91E-02 | 1.0 | 8.60E-01 |
| TAG C60:4 | [M + NH4] <sup>+</sup> | 984.8959 | 984.8980 | -2.1 | 1.2 | 7.00E-02 | 0.4 | 3.78E-03 |
| Cer C14:0 | [M - H] <sup>-</sup>   | 508.4730 | 508.4741 | -1.6 | 0.5 | 2.80E-04 | 2.4 | 1.26E-02 |

|              |                      |          |          |      |     |          |     |          |
|--------------|----------------------|----------|----------|------|-----|----------|-----|----------|
| Cer C16:1    | [M - H] <sup>-</sup> | 534.4886 | 534.4875 | 2.3  | 0.6 | 3.50E-03 | 1.1 | 7.38E-01 |
| Cer C18:1    | [M - H] <sup>-</sup> | 562.5199 | 562.5189 | 2.0  | 0.4 | 6.35E-05 | 0.3 | 6.21E-04 |
| Cer C18:0    | [M - H] <sup>-</sup> | 564.5356 | 564.5381 | -4.7 | 0.4 | 3.05E-05 | 0.6 | 6.19E-03 |
| Cer C20:0    | [M - H] <sup>-</sup> | 592.5669 | 592.5682 | -2.2 | 0.5 | 7.73E-05 | 0.6 | 2.71E-03 |
| Cer C22:1    | [M - H] <sup>-</sup> | 618.5825 | 618.5837 | -1.9 | 0.4 | 7.85E-05 | 0.3 | 3.27E-04 |
| Cer C22:0    | [M - H] <sup>-</sup> | 620.5982 | 620.5995 | -2.1 | 0.6 | 2.35E-04 | 0.5 | 1.97E-03 |
| Cer C24:1    | [M - H] <sup>-</sup> | 646.6138 | 646.6155 | -2.6 | 0.6 | 2.64E-04 | 0.6 | 3.32E-03 |
| Cer C24:0    | [M - H] <sup>-</sup> | 648.6295 | 648.6305 | -1.5 | 1.0 | 4.23E-01 | 0.4 | 3.32E-04 |
| Cer C26:1    | [M - H] <sup>-</sup> | 674.6451 | 674.6471 | -3.0 | 0.7 | 1.79E-03 | 0.6 | 2.60E-03 |
| Cer C26:0    | [M - H] <sup>-</sup> | 676.6608 | 676.6645 | -5.5 | 1.3 | 1.59E-02 | 0.4 | 1.62E-04 |
| DiHCer C16:0 | [M - H] <sup>-</sup> | 538.5199 | 538.521  | -2.0 | 0.5 | 1.52E-06 | 8.9 | 1.36E-03 |
| DiHCer C18:0 | [M - H] <sup>-</sup> | 566.5512 | 566.5541 | -5.1 | 0.5 | 1.49E-03 | 3.3 | 9.02E-04 |
| DiHCer C20:0 | [M - H] <sup>-</sup> | 594.5825 | 594.5819 | 1.0  | 0.5 | 2.25E-03 | 1.7 | 2.43E-04 |
| DiHCer C22:0 | [M - H] <sup>-</sup> | 622.6138 | 622.6137 | 0.2  | 0.6 | 7.40E-04 | 1.7 | 3.72E-04 |
| DiHCer C24:0 | [M - H] <sup>-</sup> | 650.6451 | 650.6452 | -0.2 | 0.9 | 2.91E-01 | 0.8 | 2.69E-02 |
| SM C14:0     | [M + H] <sup>+</sup> | 675.5436 | 675.5443 | -1.0 | 0.7 | 1.26E-01 | 1.4 | 1.65E-01 |
| SM C16:1     | [M + H] <sup>+</sup> | 701.5592 | 701.5598 | -0.9 | 0.7 | 1.36E-01 | 1.1 | 7.33E-01 |
| SM C16:0     | [M + H] <sup>+</sup> | 703.5749 | 703.577  | -3.0 | 0.8 | 1.97E-01 | 1.2 | 3.68E-01 |
| SM C24:0     | [M + H] <sup>+</sup> | 815.7001 | 815.703  | -3.6 | 0.7 | 4.29E-02 | 0.7 | 8.67E-02 |
| SM C18:1     | [M + H] <sup>+</sup> | 729.5905 | 729.5876 | 4.0  | 0.6 | 1.40E-02 | 1.0 | 8.32E-01 |
| SM C18:0     | [M + H] <sup>+</sup> | 731.6062 | 731.6038 | 3.3  | 0.6 | 1.65E-02 | 0.9 | 4.67E-01 |
| SM C22:0     | [M + H] <sup>+</sup> | 787.6688 | 787.6676 | 1.5  | 0.5 | 1.53E-02 | 0.8 | 2.31E-01 |
| SM C24:1     | [M + H] <sup>+</sup> | 813.6844 | 813.6855 | -1.4 | 0.5 | 8.67E-03 | 0.7 | 9.92E-02 |

|            |                      |          |          |     |     |          |     |          |
|------------|----------------------|----------|----------|-----|-----|----------|-----|----------|
| SM C26:1   | [M + H] <sup>+</sup> | 841.7157 | 841.7156 | 0.1 | 0.4 | 1.01E-02 | 0.7 | 4.51E-02 |
| SM C26:0   | [M + H] <sup>+</sup> | 843.7314 | 843.7291 | 2.7 | 0.6 | 1.46E-02 | 0.7 | 1.38E-01 |
| dHSM C14:0 | [M + H] <sup>+</sup> | 677.5592 | 677.558  | 1.5 | 0.5 | 1.22E-02 | 2.8 | 5.58E-03 |
| dHSM C16:0 | [M + H] <sup>+</sup> | 705.5905 | 705.590  | 1.0 | 0.4 | 2.56E-03 | 1.7 | 2.29E-02 |
| dHSM C22:1 | [M + H] <sup>+</sup> | 59.531   | 785.649  | 4.7 | 0.4 | 7.81E-03 | 0.8 | 3.27E-01 |

CER: ceramide; DAG: diacylglycerol; DeoxyCER: deoxyceramide; DiHCER: dihydroceramide; DiHDeoxyCER: dihydrodeoxyceramide; n.d: not detected; PC: phosphatidylcholine; SM: sphingomyelin; TAG: triacylglycerol.

**Table S5.** MS/MS analysis of PCs and SMs most abundant lipid species and respective most common *m/z* fragments in order of intensity TThe totaltotal [2-4]. The total carbon number on the acyl chains and the degree of unsaturation of the fatty acyl chains in the lipid species are listed, i.e. 16:0 corresponds to 16 carbons and 0 double bonds.

| Lipid assigned | <i>m/z</i> fragments                   |
|----------------|----------------------------------------|
| C32:0 PC       | 184.0777, 124.9996, 104.1051, 166.0654 |
| C38:4 PC       | 184.0758, 124.9974, 104.1034, 166.0641 |
| C44:1 PC       | 184.0780, 124.9993, 104.1033, 185.0799 |
| C18:0 SM       | 184.0772, 124.9979, 104.1040, 166.0633 |
| C24:0 SM       | 184.0767, 124.9977, 104.1039, 166.0647 |
| C26:1 SM       | 184.0777, 124.9985, 104.1027, 166.0643 |

### 3. References

1. Pereira, D.; Gonçalves, C.; Martins, B.T.; Palmeira, A.; Vasconcelos, V.; Pinto, M.; Almeida, J.R.; Correia-da-Silva, M.; Cidade, H. Flavonoid Glycosides with a Triazole Moiety for Marine Antifouling Applications: Synthesis and Biological Activity Evaluation. *Marine Drugs* **2021**, *19*, 5.
2. Brovkovich, V.; Izhar, Y.; Danes, J.M.; Dubrovskiy, O.; Sakallioğlu, I.T.; Morrow, L.M.; Atilla-Gökçumen, G.E.; Frasor, J. Fatostatin induces pro- and anti-apoptotic lipid accumulation in breast cancer. *Oncogenesis* **2018**, *7*, 66, doi:10.1038/s41389-018-0076-0.

3. Li, N.; Lizardo, D.Y.; Atilla-Gokcumen, G.E. Specific Triacylglycerols Accumulate via Increased Lipogenesis During 5-FU-Induced Apoptosis. *ACS Chemical Biology* **2016**, *11*, 2583-2587, doi:10.1021/acscchembio.6b00410.
4. del Solar, V.; Lizardo, Darleny Y.; Li, N.; Hurst, Jerod J.; Brais, Christopher J.; Atilla-Gokcumen, G.E. Differential Regulation of Specific Sphingolipids in Colon Cancer Cells during Staurosporine-Induced Apoptosis. *Chemistry & Biology* **2015**, *22*, 1662-1670, <https://doi.org/10.1016/j.chembiol.2015.11.004>.
